# Supplementary material
Source: PubMed Central journal article supplement (PMC5877982)
Supplement: pnas.201719969SI.pdf [file pnas.201719969SI.pdf]

# Supporting Information

Kravats et al. 10.1073/pnas.1719969115

|         |     |                                                                  |
|---------|-----|------------------------------------------------------------------|
| Hsp82   | 1   | -MASETFEFQAEITQLMSLIINTVYSNKEIFLRELI SNASDALDKIRYKSLSDPKQLETE    |
| Hsc82   | 1   | -MASETFEFQAEITQLMSLIINTVYSNKEIFLRELI SNASDALDKIRYQALS DPKQLETE   |
| Hsp90Ec | 1   | MKGQETRGFQSEVKQLLHLMHSLYSNKEIFLRELI SNASDAADKLRFRALSNPDLYEGD     |
| Hsp82   | 60  | PDLFIRITPKPEQKVLEIRDSGIGMTKAEIINNLTGIIAKSGTKAFMEALSAG--ADVSMI    |
| Hsc82   | 60  | PDLFIRITPKPEQKVLEIRDSGIGMTKAEIINNLTGIIAKSGTKAFMEALSAG--ADVSMI    |
| Hsp90Ec | 61  | GELRVRVSFDKDKRTLITISDNGVGMTRDEVIDHDLGTIAKSGTKSFLLESLSGSDQAKDSQLI |
| Hsp82   | 118 | GQFGVGFYSLFLVADRQVVISKSN---DEQYIWESNAGGSFTVTLDEVNERIGRGTILR      |
| Hsc82   | 118 | GQFGVGFYSLFLVADRQVVISKSN---DEQYIWESNAGGSFTVTLDEVNERIGRGTILR      |
| Hsp90Ec | 121 | GQFGVGFYSAFIVADKVTVRTRAAGEKPEENGVFWESAGEGEYTVADIT---KEDRGTEIT    |
| Hsp82   | 175 | LFLKDDQLEYLEEKRIKEVIKRHSEFVAYPIQLVVTKEVEKEVPIPEEEKKDEEKKDEEK     |
| Hsc82   | 175 | LFLKDDQLEYLEEKRIKEVIKRHSEFVAYPIQLVVTKEVEKEVPIPEEEKKDEEKKDEEK     |
| Hsp90Ec | 178 | LHLREGEDFLDDWRVRSIISKYSDHIALPVEIEKRE-----                        |
| Hsp82   | 235 | KDEDDKPKLEEVDDEEKEKKPKTKKVKKEEVQEEELNKT KPLWTRNPSDITQEEYNAFY     |
| Hsc82   | 230 | KDEDDKPKLEEVDDEEKEKKPKTKKVKKEEVQEEELNKT KPLWTRNPSDITQEEYNAFY     |
| Hsp90Ec | 215 | -----EKDGETVISWEKINKAQLWTRNKS EITDEBEYKIFY                       |
| Hsp82   | 294 | KSISNDWEDPLYVKHFSVEGQLEFRALFIPKRAPFDLFESKSKKNNIKLYVRRVFITDE      |
| Hsc82   | 290 | KSISNDWEDPLYVKHFSVEGQLEFRALFIPKRAPFDLFESKSKKNNIKLYVRRVFITDE      |
| Hsp90Ec | 251 | KHIAHDFNDPLTWSHNRVEGKQEYTSLLYIPSQAPWDMWNRD-HKHGLKLYVQRFVIMDD     |
| Hsp82   | 354 | AEDLIPWLSFVKGVDSEDLPLNLSREMLQQNKIMKVIKKNIVKKLIEAFNEIA-EDSE       |
| Hsc82   | 350 | AEDLIPWLSFVKGVDSEDLPLNLSREMLQQNKIMKVIKKNIVKKLIEAFNEIA-EDSE       |
| Hsp90Ec | 310 | AEQFMPNYLRFVRGLIDSSDLPLNVSREILQDSTVTRNLRNALTKRVLQMLEKLAKD DAE    |
| Hsp82   | 413 | QFEKFYSAFSKNIKLGVEDTQNRAALAKLLRYNSTKS--VDELTSLTDYVTRMPEHQKN      |
| Hsc82   | 409 | QFEKFYSAFSKNIKLGVEDTQNRAALAKLLRYNSTKS--VDELTSLTDYVTRMPEHQKN      |
| Hsp90Ec | 370 | KYQTFWQQFGLVLKEGPAEDFANQEAIAKLLRFASHTDSSAQTVSLEDYVSRMKEGQEK      |
| Hsp82   | 471 | IYYITGESLKAVEKSPFLDALKAKNFEVLFVLTDPIDEYAFQTLKEFEGKTLVDITKDFEL    |
| Hsc82   | 467 | IYYITGESLKAVEKSPFLDALKAKNFEVLFVLTDPIDEYAFQTLKEFEGKTLVDITKDFEL    |
| Hsp90Ec | 430 | IYYITADS YAAAKSSPHLELLRKKGIEVLLLSDRIDEWMMNYLTEFDGKPFQSVSKVDES    |
| Hsp82   | 531 | E-ETDEE-KAEREKEIKEYEPLTKALKILGDQVEKVVVSYKLLDAPAAIRTGQFGWSAN      |
| Hsc82   | 527 | E-ETDEE-KAEREKEIKEYEPLTKALKILGDQVEKVVVSYKLLDAPAAIRTGQFGWSAN      |
| Hsp90Ec | 490 | LEKLADDEVDESAKEAEKALTFIDRVKALLGERVKDVR LTHR LDT PAIVSTDAEMSTQ    |
| Hsp82   | 589 | MERIMKAQALRDSSMSYSSKKTFEISPKSPIIKELKKRVDEGGAQDKTVKDLTKLLYE       |
| Hsc82   | 585 | MERIMKAQALRDSSMSYSSKKTFEISPKSPIIKELKKRVDEGGAQDKTVKDLTKLLYE       |
| Hsp90Ec | 550 | MAKLF AAAGQKV-----PEVKYIFELNPDHVLVKRAADTE-----DEAKFSEWVELLLD     |
| Hsp82   | 649 | TALLTSGFSLDEPTSFASRNRLISLGLNIDEDEETETAPEASTAPVVEVPADTEMEEV       |
| Hsc82   | 645 | TALLTSGFSLDEPTSFASRNRLISLGLNIDEDEETETAPEASTAPVVEVPADTEMEEV       |
| Hsp90Ec | 599 | QALLAERGTLEDPNLFI RRMNQLLVS-----                                 |
| Hsp82   | 709 | D                                                                |
| Hsc82   | 705 | D                                                                |
| Hsp90Ec | -   | -                                                                |

**Fig. S1.** Sequence alignment of Hsp82, Hsc82, and Hsp90<sub>Ec</sub>. Protein sequences were obtained from UniProt and aligned by T-COFFEE ([tcoffee.crg.cat/](http://tcoffee.crg.cat/)) (1) using default parameters. The figure was produced using the BOXSHADE program ([https://www.ch.embnet.org/software/BOX\\_form.html](https://www.ch.embnet.org/software/BOX_form.html)). The differences between Hsp82 and Hsc82 are highlighted in yellow, involving 16 amino acid substitutions and two gaps within the 709 amino acids of Hsp82. The residues focused on in this study are shaded in gray and are conserved between Hsp82 and Hsc82. Additionally, three of the five residues in this study are conserved from *E. coli* to yeast. Identical residues are in black type, similar residues are in blue, and dissimilar residues are red.

1. Notredame C, Higgins DG, Heringa J (2000) T-Coffee: A novel method for fast and accurate multiple sequence alignment. *J Mol Biol* 302:205–217.

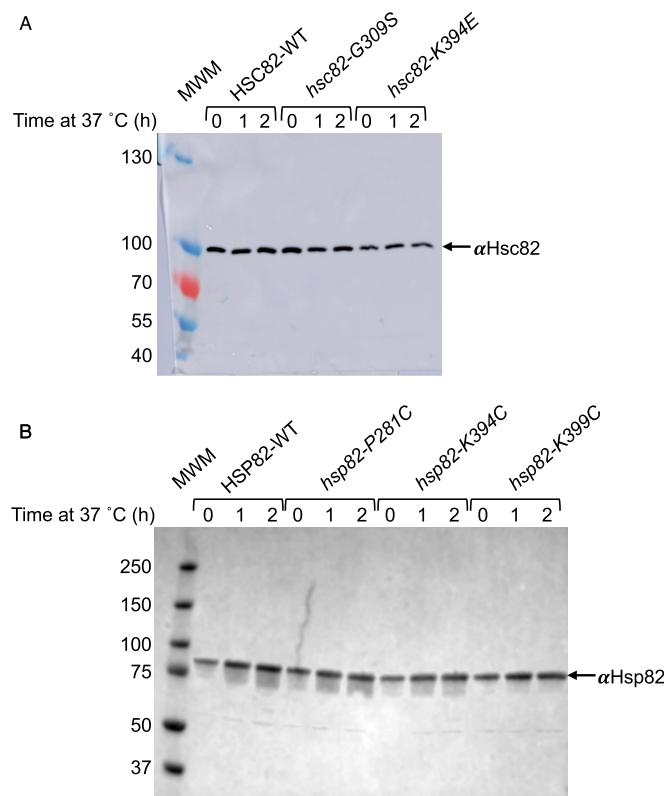

**Fig. S2.** Expression levels of Hsc82 and Hsp82 mutant proteins. (A) Overnight cultures of strains expressing wild-type Hsc82 or mutant proteins were diluted to a starting  $OD_{600} = 0.3$  and were grown at 30 °C until  $OD_{600} = 1.0$ . A sample of each culture (30 °C sample) was taken at  $t = 0$ . Each culture was then transferred to a 37 °C shaking incubator. Additional samples were taken at  $t = 1$  h and  $t = 2$  h. The cells were lysed in PBS containing 1% SDS and 0.1% Triton X-100 using glass beads. SDS PAGE loading dye was added, and samples were boiled and run on a 7.5% gel followed by Western blot analysis using antibody specific to Hsc82. (B) Overnight cultures of strains expressing wild-type Hsp82 or mutant proteins were diluted to a starting  $OD_{600} = 0.3$  and grown at 30 °C until  $OD_{600} = 1.0$ . A sample of each culture (30 °C sample) was taken at  $t = 0$ . Each culture was then transferred to a prewarmed tube in a 37 °C water bath. Additional samples were taken at  $t = 1$  h and  $t = 2$  h. The cells were lysed in 50 mM Hepes (pH 7.3), 100 mM NaCl, 2 mM  $MgCl_2$ , and 0.1% Tween 20 with protease inhibitors using glass beads. Lysates were spun at  $5,000 \times g$  for 5 min, SDS PAGE loading dye was added, and samples were boiled and run on a 4–20% Criterion gel followed by Western blot analysis using antibody specific to Hsp82 (SPA-840).

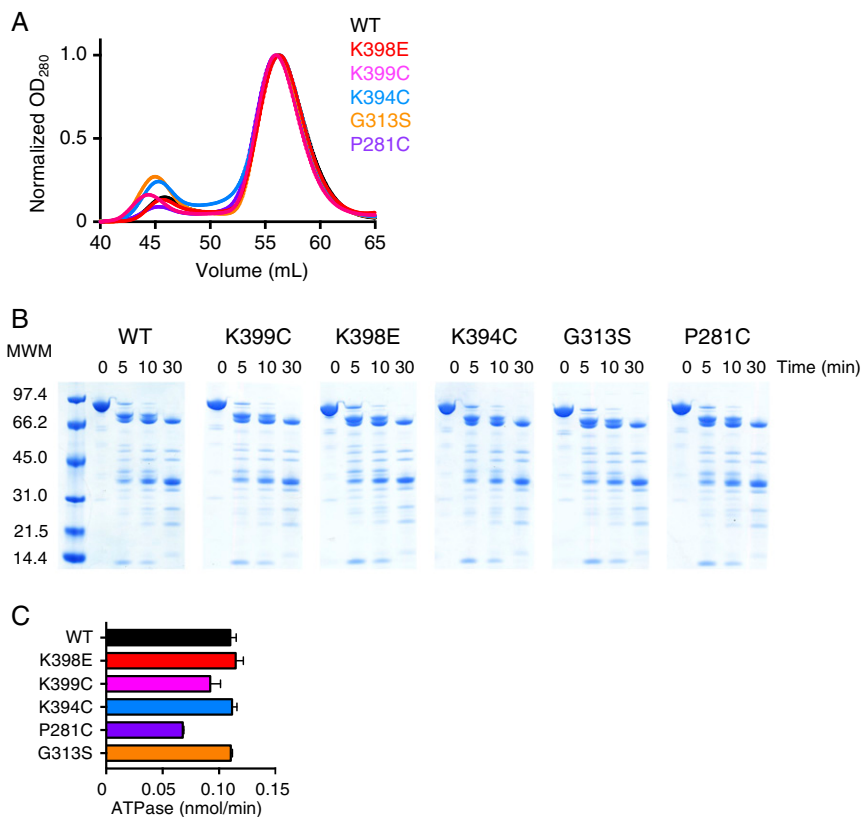

**Fig. S3.** Properties of Hsp82 mutant proteins. (A) Size-exclusion chromatography of Hsp82 mutants. Gel-filtration analyses of purified wild-type Hsp82 or mutants were performed with a HiLoad 16/60 Superdex 200 column (GE Healthcare) equilibrated with Tris-HCl buffer (50 mM, pH 7.5) containing 100 mM KCl, 10% glycerol, and 1 mM DTT. (B) Partial protease digestion patterns of Hsp82 mutant proteins compared with the wild type. Reaction mixtures (50  $\mu$ L) containing wild-type or mutant Hsp82 (15  $\mu$ g), 25 mM Hepes (pH 7.5), 50 mM KCl, and 2 mM DTT were made, and 10  $\mu$ L of each reaction was removed ( $t = 0$ ). Trypsin (10 ng) was added to the remaining reaction mixtures, which were incubated at 37  $^{\circ}$ C for the indicated times. Proteolysis was terminated with LDS sample buffer. The samples were incubated at 85  $^{\circ}$ C for 5 min and analyzed by Coomassie staining following SDS/PAGE. (C) ATP hydrolysis by Hsp82 mutant proteins compared with the wild type. Assays were carried out as described in *Materials and Methods*, and data are presented as the mean  $\pm$  SEM ( $n = 3$ ).





**Table S2. In vitro effects of Hsp82 amino acid substitutions on protein–protein interactions and activity**

| Hsp82 wild type or substitution mutant | Hsp82–Ssa1 interaction (BLI) | Hsp82–Ssa1 pulldown (binary) | Hsp82–Ssa1 pulldown + Sti1 | Hsp82–Ssa1 pulldown + Sti1 and Ydj1 | Luciferase refolding | Hsp82–Sti1 interaction (BLI and pulldown) | ATP hydrolysis | Inhibition of ATP hydrolysis by Sti1 |
|----------------------------------------|------------------------------|------------------------------|----------------------------|-------------------------------------|----------------------|-------------------------------------------|----------------|--------------------------------------|
| Hsp82 WT                               | +++                          | +++                          | +++                        | +++                                 | +++                  | +++                                       | +++            | +++                                  |
| Hsp82-P281C                            | ++                           | +++                          | +++                        | +++                                 | +++                  | +++                                       | ++             | +++                                  |
| Hsp82-G313S                            | –                            | +                            | ++                         | ++                                  | –                    | +++                                       | +++            | +++                                  |
| Hsp82-K394C                            | –                            | –                            | +                          | +                                   | –                    | +++                                       | +++            | +++                                  |
| Hsp82-K398E                            | –                            | –                            | –                          | +                                   | –                    | +++                                       | +++            | +++                                  |
| Hsp82-K399C                            | –                            | +                            | +                          | +                                   | –                    | +++                                       | +++            | +++                                  |

Each plus sign indicates ~33% activity.
